# Supplementary material for: Exploring 2-Sulfonylpyrimidine Warheads as Acrylamide Surrogates for Targeted Covalent Inhibition: A BTK Story
Source: PubMed Central journal article supplement (PMC11345841; doi:10.1021/acs.jmedchem.3c01927), 2024-08-09

## Supporting Information

### Exploring 2-Sulfonylpyrimidine Warheads as Acrylamide Surrogates for Targeted Covalent Inhibition: a BTK Story

Ruxandra Moraru<sup>a</sup>, Beatriz Valle-Argos<sup>b</sup>, Annabel Minton<sup>b</sup>, Lara Buermann<sup>b</sup>, Suyin Pan<sup>a</sup>, Thomas E. Wales<sup>c</sup>, Raji E. Joseph<sup>d</sup>, Amy H. Andreotti<sup>d</sup>, Jonathan C. Strefford<sup>b</sup>, Graham Packham<sup>b\*</sup>, Matthias G. J. Baud<sup>a\*</sup>

<sup>a</sup>School of Chemistry and Institute for Life Sciences, University of Southampton, Southampton, SO17 1BJ, United Kingdom

<sup>b</sup>Cancer Sciences, Faculty of Medicine, University of Southampton, Southampton, SO16 6YD, United Kingdom.

<sup>c</sup>Department of Chemistry and Chemical Biology, Northeastern University, Boston, MA 02115, USA.

<sup>d</sup>Roy J. Carver Department of Biochemistry, Biophysics and Molecular Biology, Iowa State University, Ames, IA 50011, USA.

\*To whom correspondence should be addressed:  
[m.baud@soton.ac.uk](mailto:m.baud@soton.ac.uk), [G.K.Packham@soton.ac.uk](mailto:G.K.Packham@soton.ac.uk)

## Table of Content

|                                                                                                                              |       |
|------------------------------------------------------------------------------------------------------------------------------|-------|
| BTK Mass spectrometry experiments.....                                                                                       | 3     |
| Summary of the BCR pathway.....                                                                                              | 6     |
| Compound induced Ca <sup>2+</sup> response.....                                                                              | 7     |
| Western blot quantifications.....                                                                                            | 7     |
| Compound induced Ca <sup>2+</sup> response (dose dependent).....                                                             | 8     |
| Cell viability analysed using annexin V/PI staining.....                                                                     | 9     |
| Gene set enrichment analysis.....                                                                                            | 10    |
| Comparison of DTT and TCEP on the activity of BTK and its inhibition by compounds.....                                       | 11    |
| Inhibition of poly-Glu:Tyr <i>in vitro</i> phosphorylation by wild type BTK by 2-SP functionalised Ibrutinib analogues ..... | 12    |
| Inhibition of poly-Glu:Tyr <i>in vitro</i> phosphorylation by BTK C481S by Ibrutinib and compounds <b>8a-d</b> .....         | 13    |
| Characterisation of compounds <b>8a-d</b> .....                                                                              | 14-21 |

**Figure S1.** Modification of intact FL WT BTK (top) by **8a (A)**, **8b (B)**, **8c (C)**, **8d (D)**, and Ibrutinib (**E**, control). All experiments show evidence of single modification, although at varying rates. The same experiments with FL C481S BTK mutant (bottom) show no sign of covalent modification. **(F)** Summary of calculated protein mass shifts for each covalent modifier.

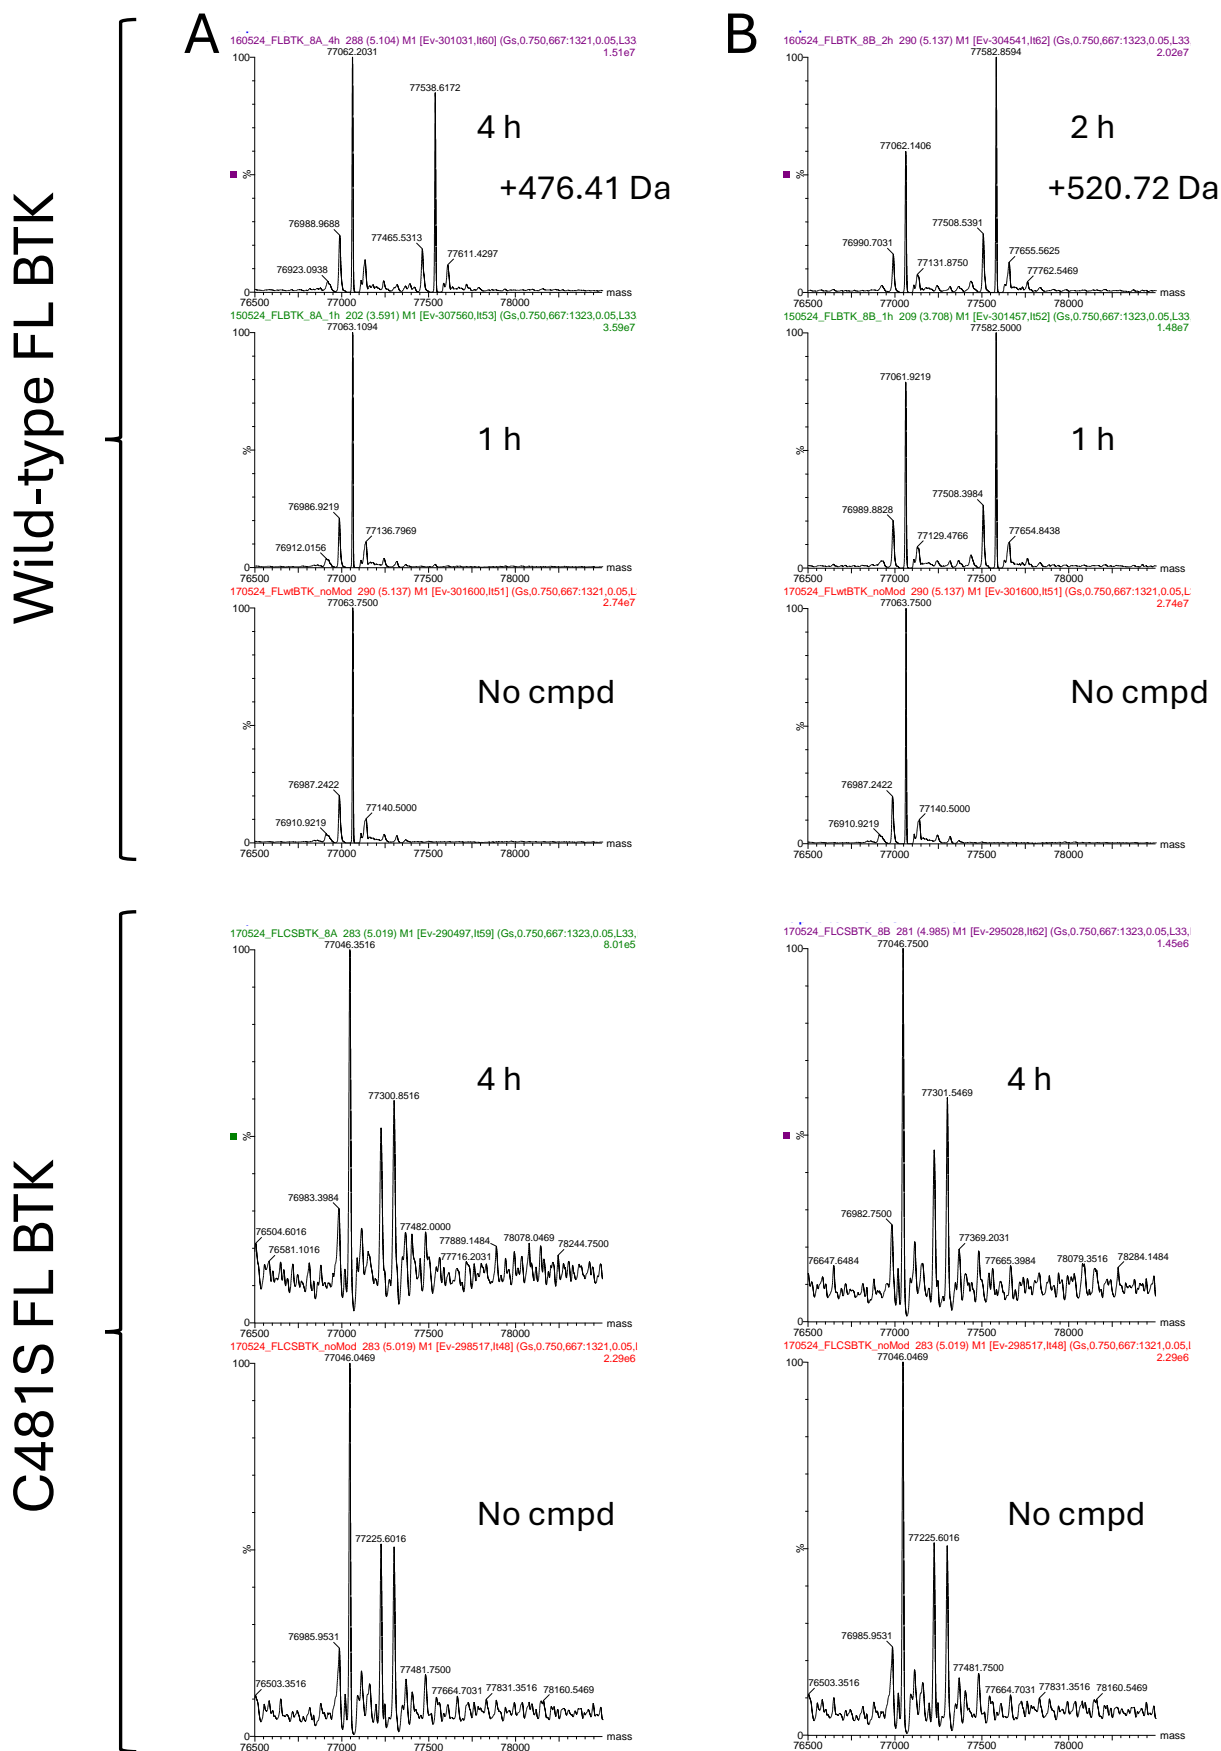

Wild-type FL BTK

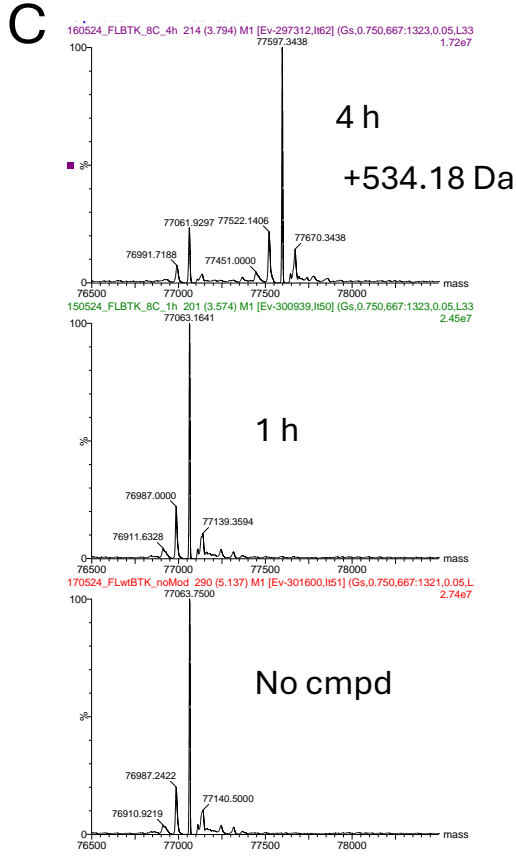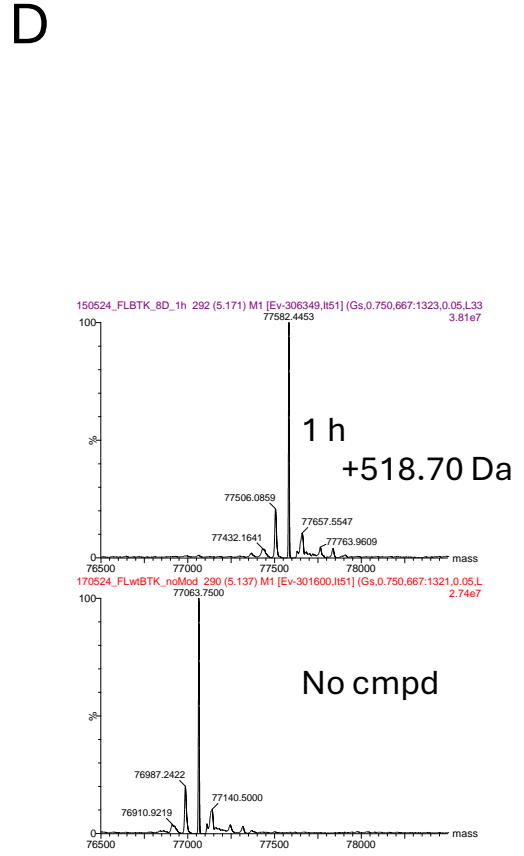

C481S FL BTK

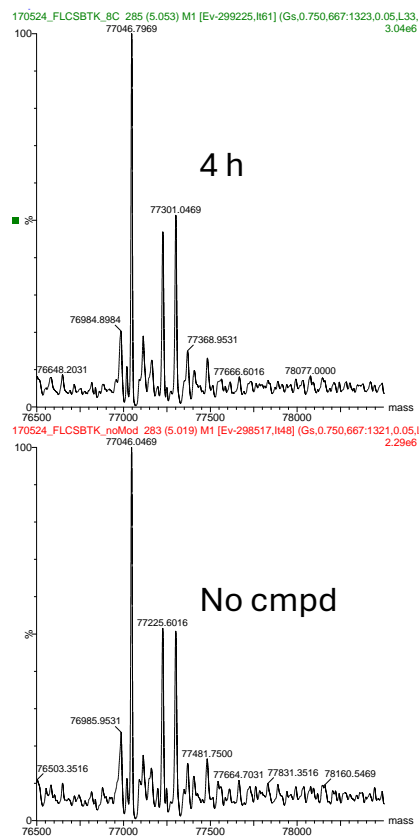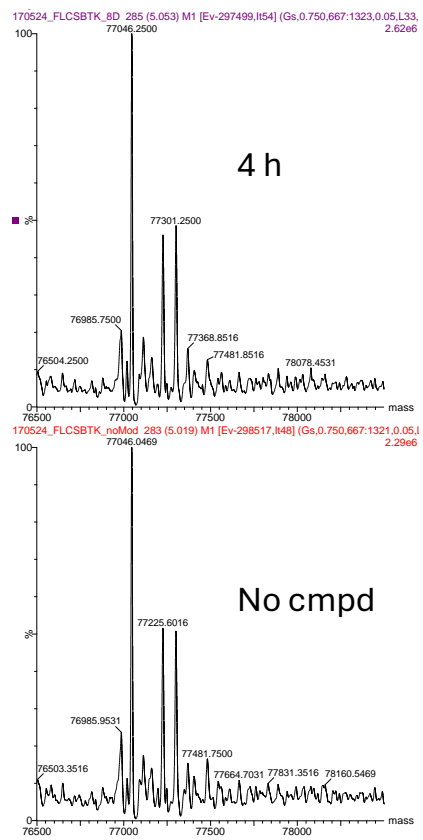

Wild-type FL BTK

### E Ibrutinib

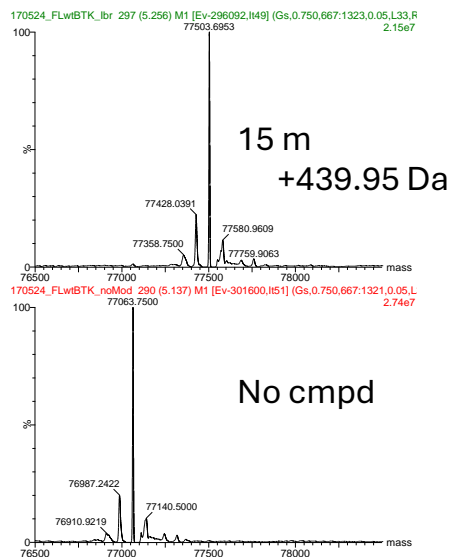

### F

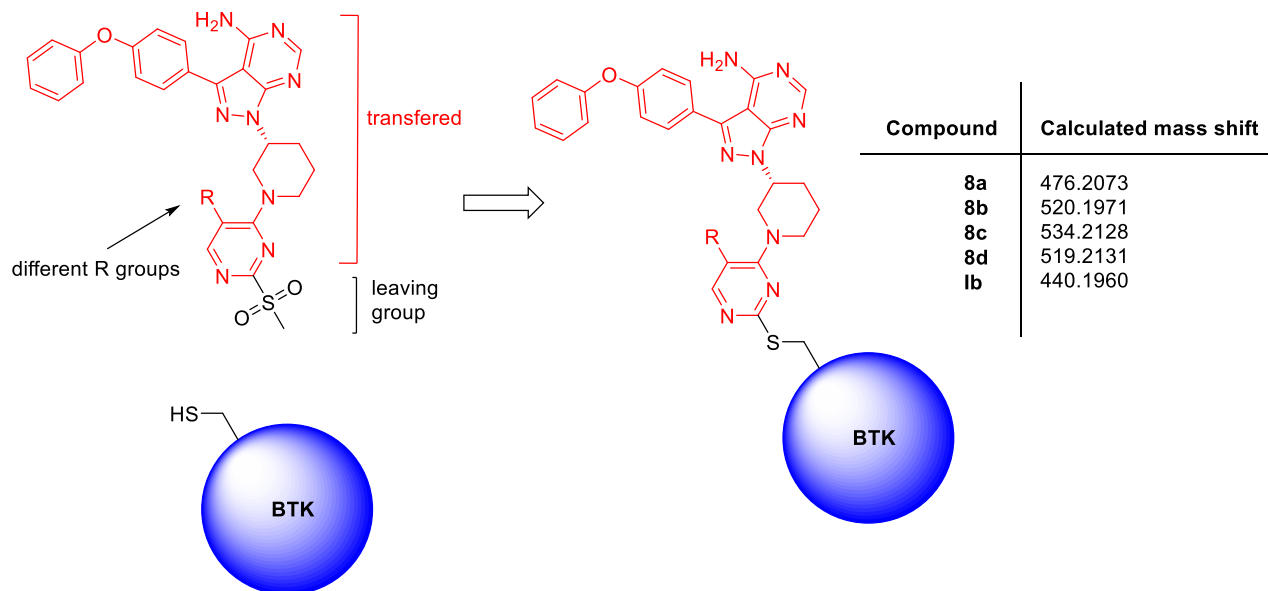

**Figure S2.** Activation of BTK and PLC $\gamma$ 2 downstream of the BCR. The BCR comprises an antigen-binding immunoglobulin coupled to CD79A and CD79B signal transduction molecules. BCR engagement leads to activation of proximal kinases, such as LYN and SYK. BTK is activated by SYK-mediated phosphorylation and autophosphorylation and, with the scaffold protein BLNK, mediates activation of PLC $\gamma$ 2. Once activated, PLC $\gamma$ 2 cleaves phosphatidylinositol 4,5-bisphosphate (PI(4,5)P<sub>2</sub>) to generate inositol 1,4,5-trisphosphate (IP<sub>3</sub>) and diacylglycerol (DAG), leading to increased intracellular Ca<sup>2+</sup> (iCa<sup>2+</sup>) and activation of PKC isoforms. Key downstream effects include activation of MAP kinases and Ca<sup>2+</sup>-dependent transcription factors, such as nuclear factor- $\kappa$ B (NF- $\kappa$ B) and, *via* calmodulin (CaM) and calcineurin, nuclear factor of activated T-cells (NFAT), resulting in increased transcription of genes involved in control of survival, migration and proliferation. Note that not all pathways activated downstream of the BCR are shown.

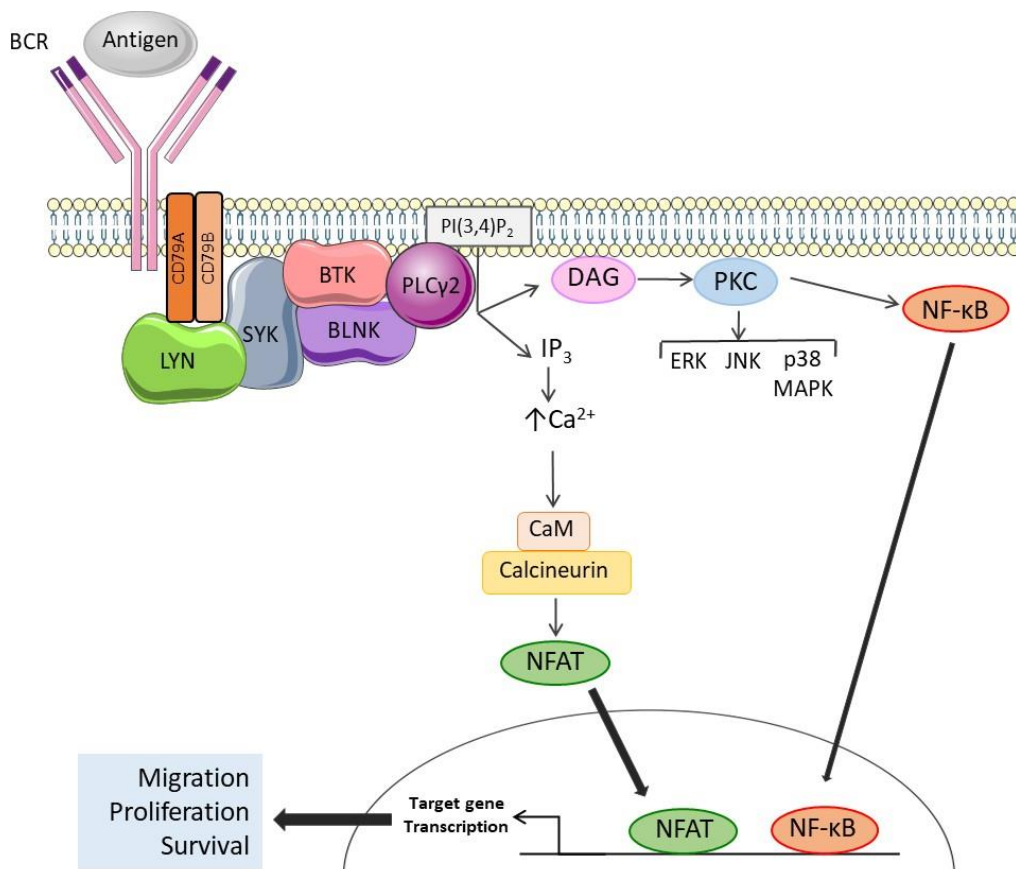

**Figure S3. (A)** Quantification of effects of compounds on anti-IgM-induced signalling in OCI-LY7 cells (relates to Figure 3 of the article main text). **Top:** Relative  $\text{Ca}^{2+}$  response (AUC; mean  $\pm$ SD) with values for DMSO-treated cells set to 100%. Data are derived from 3-7 separate determinations. **Middle:** Relative phosphorylation for BTK  $\text{Y}^{223}$ , BTK  $\text{Y}^{551}$  and BLNK  $\text{Y}^{96}$  (mean  $\pm$ SD derived from 3 independent experiments) **Bottom:** and PLC $\gamma$ 2  $\text{Y}^{1197}$  and  $\text{Y}^{1217}$  (mean  $\pm$ range derived from 2 independent experiments) with values for anti-IgM/DMSO—treated cells set to 1.0. Where shown, P-values give the significance of the effects of compounds compared to DMSO (one sample t-tests). **(B)** Effect of Ibrutinib (left), **8a** (middle) and **8d** (right) on anti-IgM-induced  $\text{Ca}^{2+}$  fluxes in OCI-LY7 cells. Cells were treated with indicated concentrations of the compounds or DMSO for 1 hour before analysis of anti-IgM-induced  $\text{Ca}^{2+}$  responses. Arrows show time of addition of anti-IgM and then ionomycin. X-axis: time in seconds.

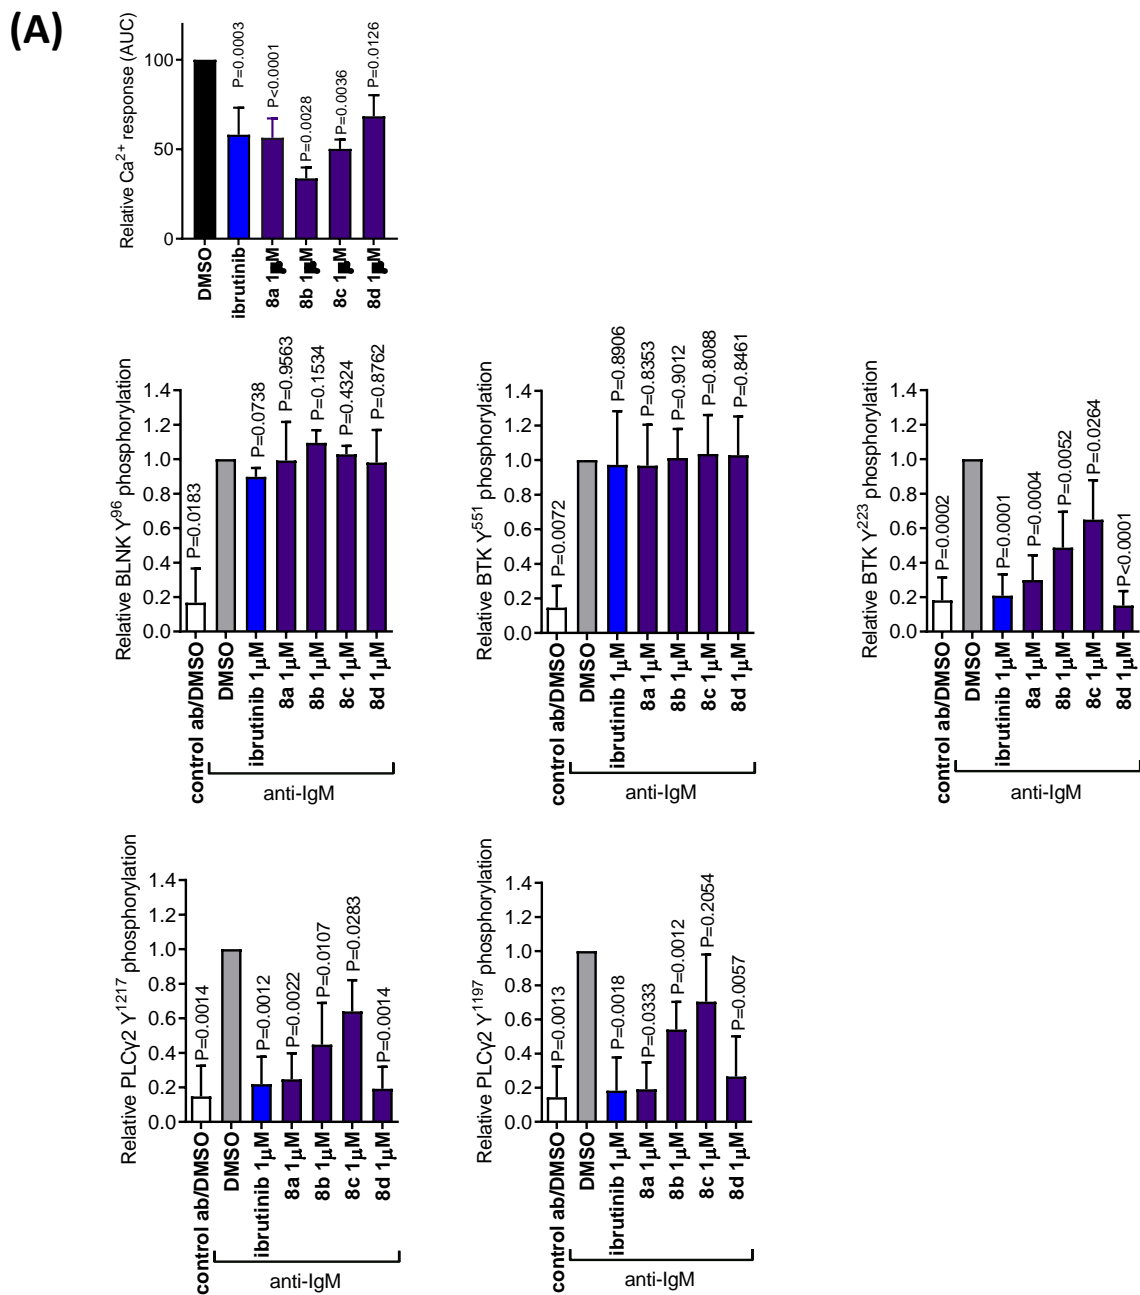

(B)

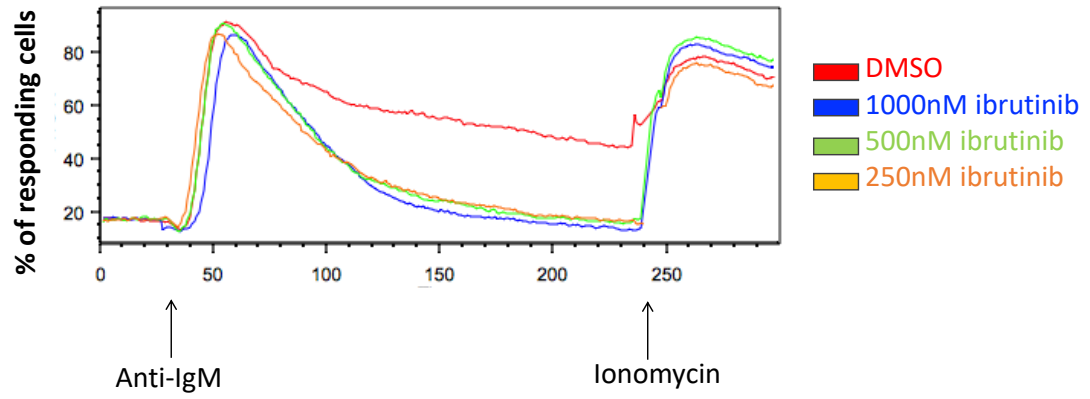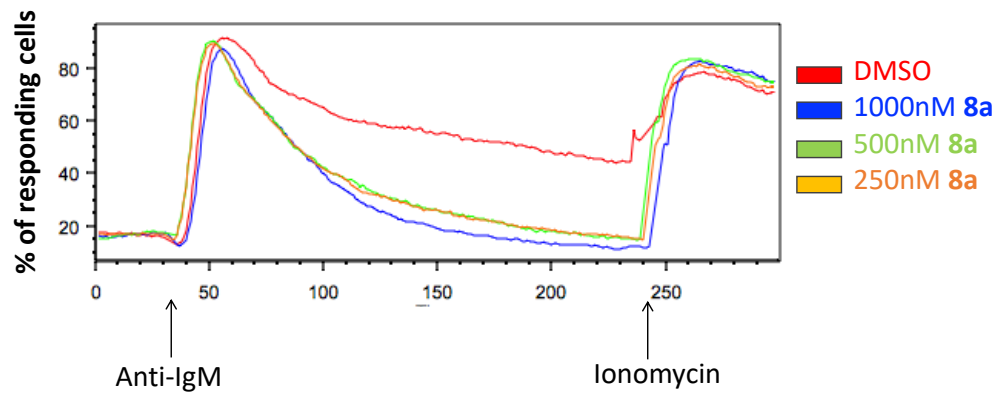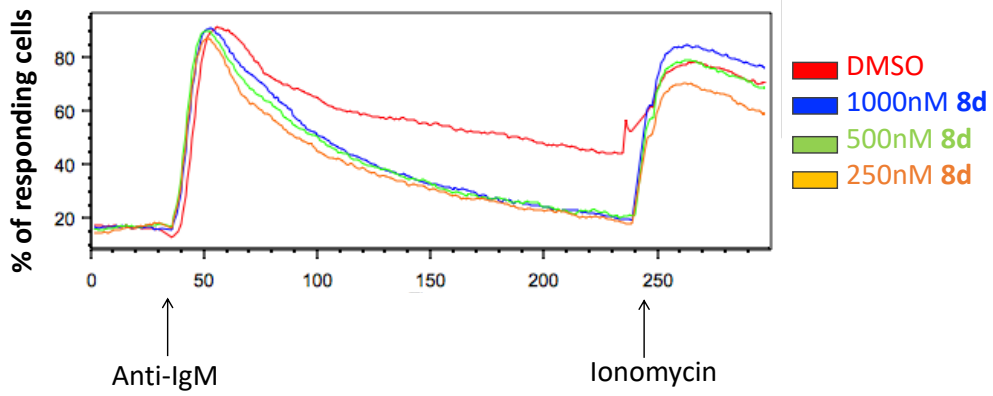



**Figure S4.** TMD8 cells were treated with the indicated concentrations of compounds for 72 hours before cell viability was analysed using annexin V/PI staining. Graph shows relative viability (i.e., annexin V<sup>-</sup>/PI<sup>-</sup> cells) with results for DMSO-treated cells set to 100% (derived from duplicate determinations).

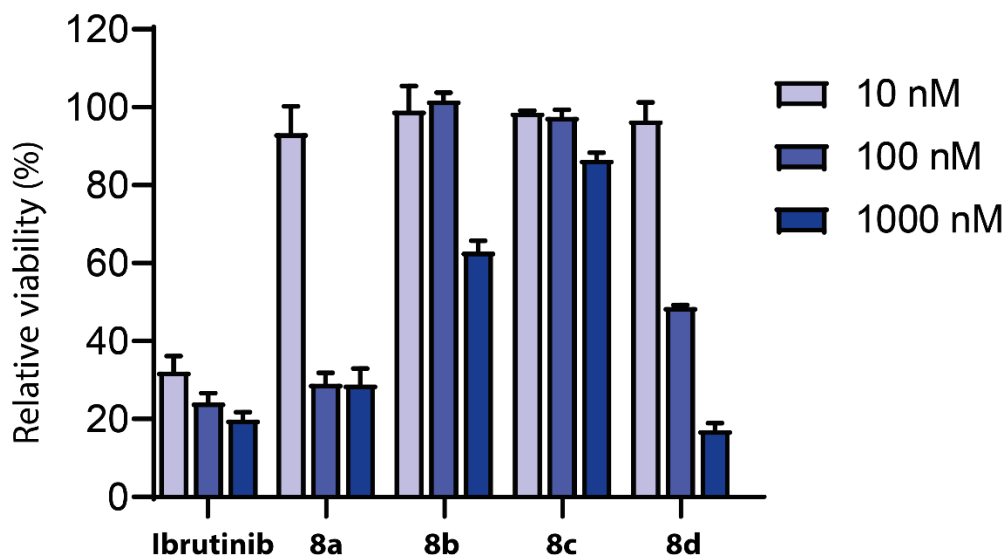

**Figure S5.** Gene set enrichment analysis. Figure shows results of comparisons between the gene expression signatures induce by the indicated compounds and the set of 125 genes that were downregulated by Ibrutinib (top row) and the set of 76 genes that were upregulated by Ibrutinib (bottom row).

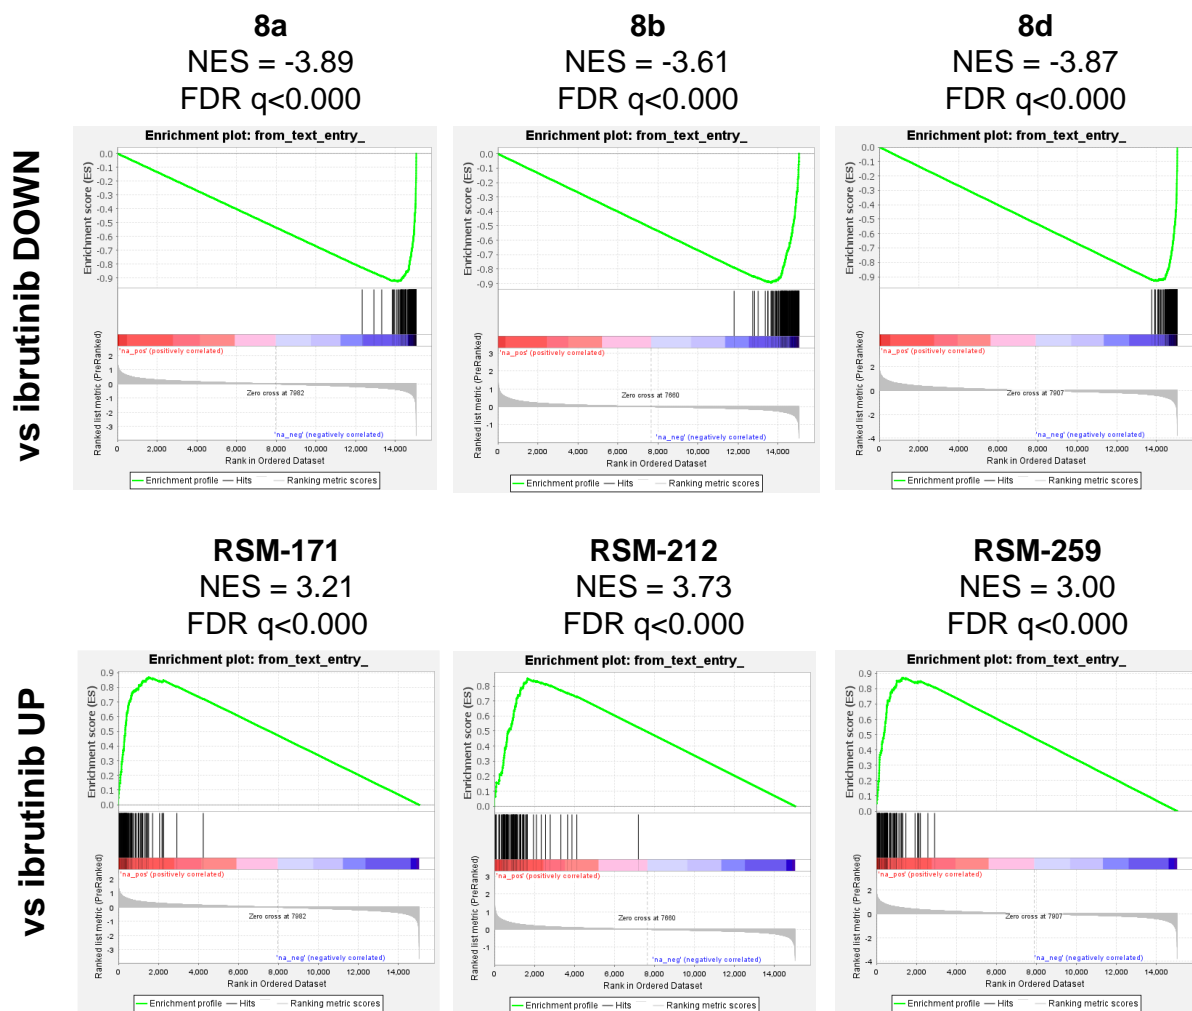

**Figure S6.** Left: activity of WT BTK in the presence of DTT (2 mM) or TCEP (1 mM) (mean±range of duplicate determinations). Right: effect of compounds on wild type BTK activity in the presence of TCEP or DTT. Compounds (100 nM) were pre-incubated with BTK in the presence of TCEP or DTT for 10 min before initiating the reaction by addition of ATP. Graphs show relative BTK kinase activity (mean±range from 2-4 determinations) relative to DMSO control (i.e. no compound, set to 100%).

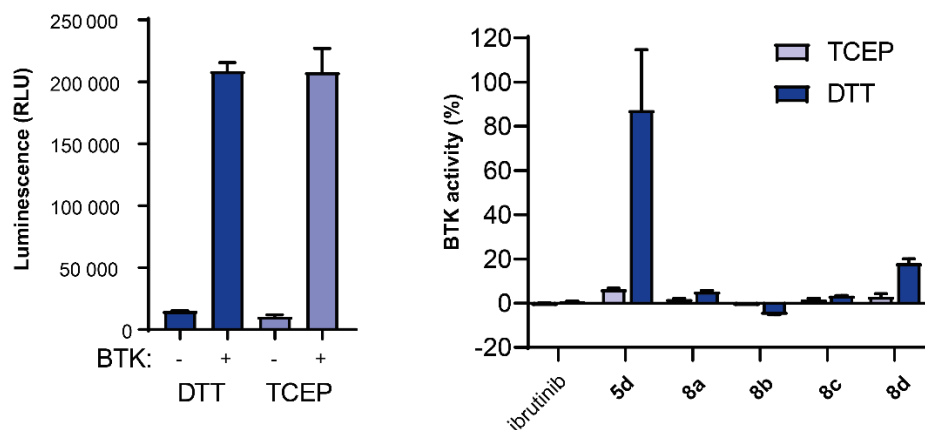

**Table S1A.** Inhibition of poly-Glu:Tyr *in vitro* phosphorylation by wild type BTK by 2-SP functionalised Ibrutinib analogues. Relative BTK activity (%; mean  $\pm$  range, 2-12 replicates) in the presence of compounds (single concentration, 100 nM) normalised against DMSO control. The colour coding is the same as used in Figure 2A, blue = thioether intermediates, orange = sulfonyl derivatives.

|                       | Compound       | Structure | Remaining BTK activity (%) | Compound | Structure | Remaining BTK activity (%) |
|-----------------------|----------------|-----------|----------------------------|----------|-----------|----------------------------|
| Controls              | DMSO (control) |           | 100 $\pm$ 2                |          |           |                            |
|                       | Ibrutinib      |           | 2.1 $\pm$ 0.8              |          |           |                            |
| Non-covalent controls | 10             |           | 100 $\pm$ 0.2              |          |           |                            |
|                       | 12b            |           | 83 $\pm$ 7                 |          |           |                            |
|                       | 12a            |           | 53 $\pm$ 2                 |          |           |                            |
| 5-amino               | 7e             |           | 69 $\pm$ 2                 | 9b       |           | 103 $\pm$ 5                |
|                       |                |           |                            | 9a       |           | 80 $\pm$ 3                 |
| Amide linked          | 4b             |           | 82 $\pm$ 1                 | 5b       |           | 58 $\pm$ 3                 |
|                       | 4c             |           | 98 $\pm$ 5                 | 5c       |           | 40 $\pm$ 1                 |
|                       | 4f             |           | 84 $\pm$ 5                 | 5f       |           | 38 $\pm$ 2                 |
|                       | 4g             |           | 100 $\pm$ 6                | 5g       |           | 35 $\pm$ 1                 |
|                       | 4a             |           | 84 $\pm$ 8                 | 5a       |           | 17 $\pm$ 1                 |
|                       | 4d             |           | 100 $\pm$ 6                | 5d       |           | 17 $\pm$ 2                 |
|                       | 4e             |           | 83 $\pm$ 9                 | 5e       |           | 9 $\pm$ 2                  |
|                       |                |           |                            |          |           |                            |
| 4-amino               | 7a             |           | 40 $\pm$ 0.3               | 8e       |           | 48 $\pm$ 0.3               |
|                       | 7b             |           | 76 $\pm$ 2                 | 8a       |           | 4 $\pm$ 1                  |
|                       |                |           | 105 $\pm$ 4                | 8b       |           | 2 $\pm$ 1                  |
|                       | 7c             |           |                            | 8c       |           | 3 $\pm$ 0.4                |
|                       | 7d             |           | 78 $\pm$ 2                 | 8d       |           | 2.0 $\pm$ 0.5              |

**Table S1B.** Inhibition of poly-Glu:Tyr *in vitro* phosphorylation by BTK C481S by Ibrutinib and compounds **8a-d**. Relative BTK activity (% , mean  $\pm$  range, 2 replicates) in the presence of compounds (100 nM) normalised against DMSO control.

| Compound       | Structure                                                                         | Remaining BTK activity (%) |
|----------------|-----------------------------------------------------------------------------------|----------------------------|
| DMSO (control) |                                                                                   | 100 $\pm$ 6                |
| Ibrutinib      |                                                                                   | 50 $\pm$ 1                 |
| <b>8a</b>      | 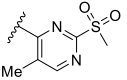 | 87 $\pm$ 11                |
| <b>8b</b>      |  | 94 $\pm$ 1                 |
| <b>8c</b>      |  | 83 $\pm$ 0.1               |
| <b>8d</b>      |  | 81 $\pm$ 4                 |

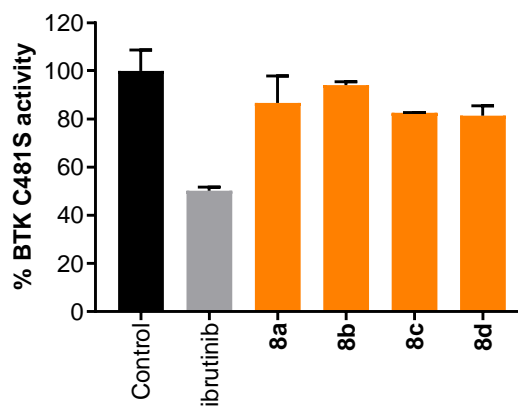

# COPY OF REPRESENTATIVE SPECTRAL DATA

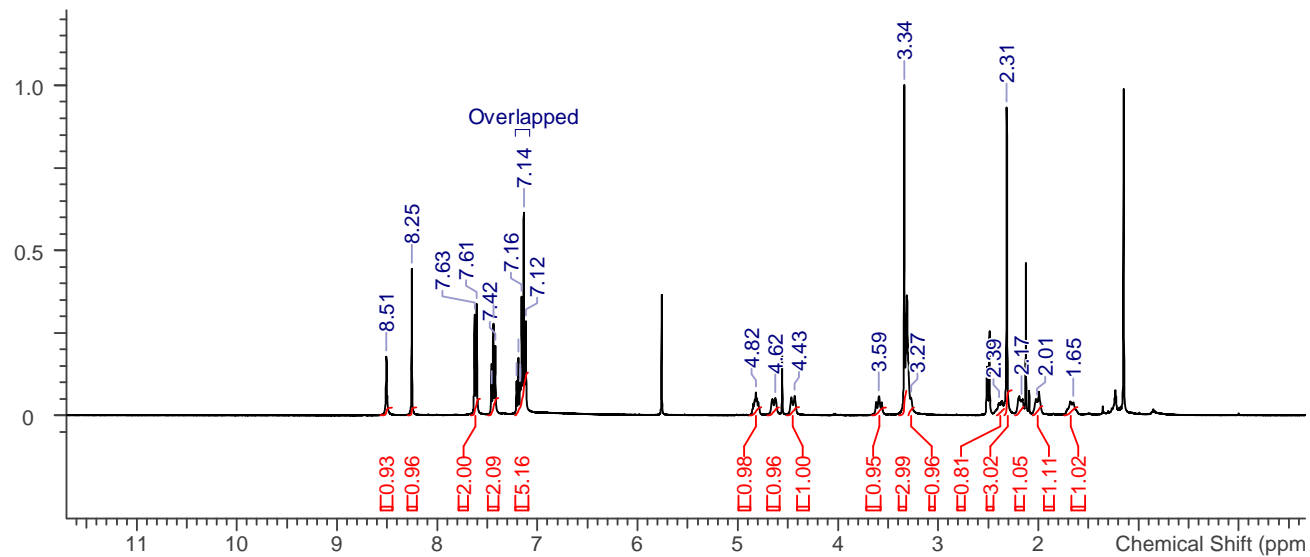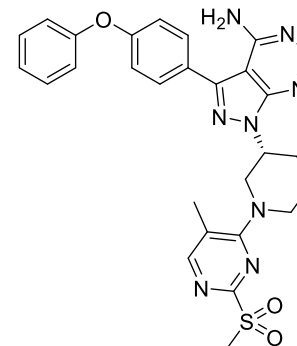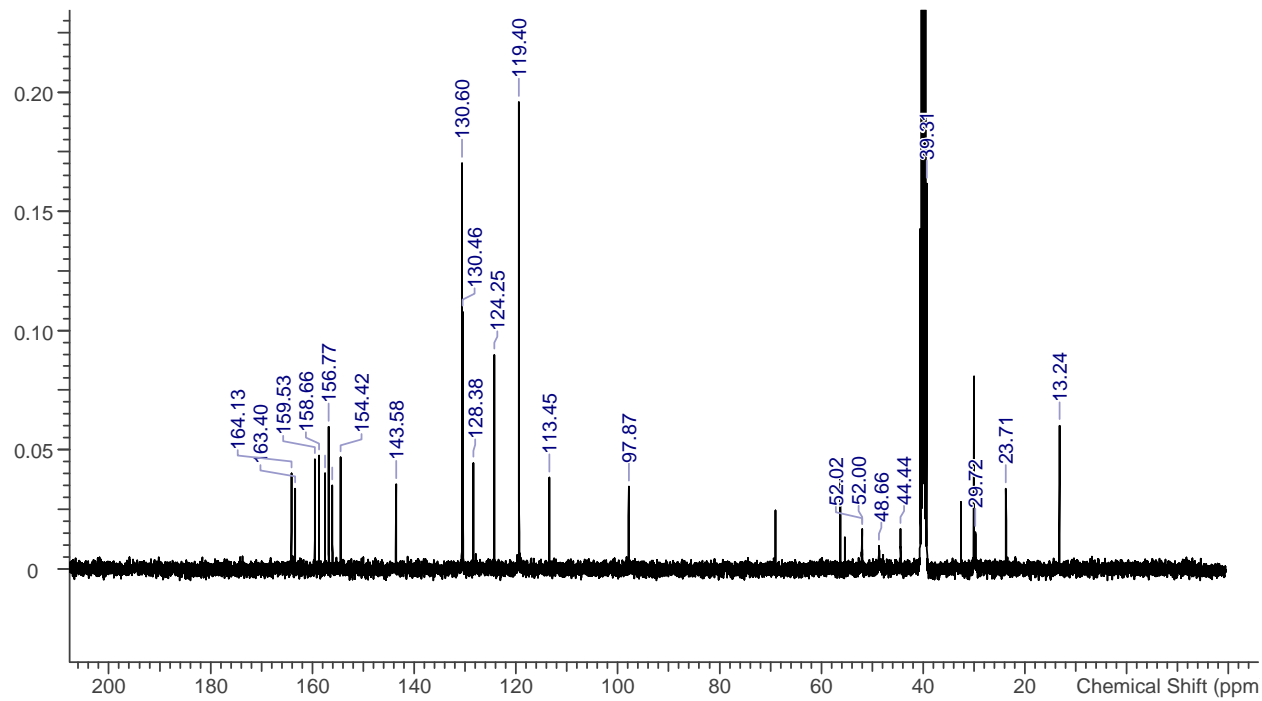

# Chemistry - maXis HPLC-ESI Accurate Mass Report

## Analysis Info

Analysis Name D:\Data\Chemistry\2021\Nov\RSM 301\_RA6\_01\_42966.d  
Method soton lcms pos 120 to 1500.m  
Sample Name RSM 301  
Comment Analyst: RB

Acquisition Date 26/11/2021 14:28:40

Operator MSWEB@SOTON.AC.UK  
Instrument / Ser# maXis 17

## Acquisition Parameter

|             |            |                       |           |                  |           |
|-------------|------------|-----------------------|-----------|------------------|-----------|
| Source Type | ESI        | Ion Polarity          | Positive  | Set Nebulizer    | 4.0 Bar   |
| Focus       | Not active | Set Capillary         | 4000 V    | Set Dry Heater   | 230 °C    |
| Scan Begin  | 120 m/z    | Set End Plate Offset  | -500 V    | Set Dry Gas      | 6.0 l/min |
| Scan End    | 1500 m/z   | Set Collision Cell RF | 300.0 Vpp | Set Divert Valve | Waste     |

## Cmpd 1, 2.6 min

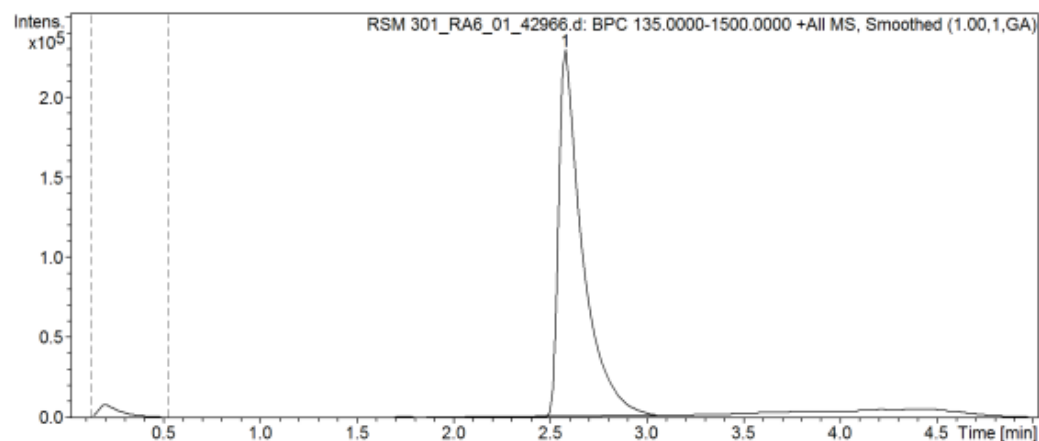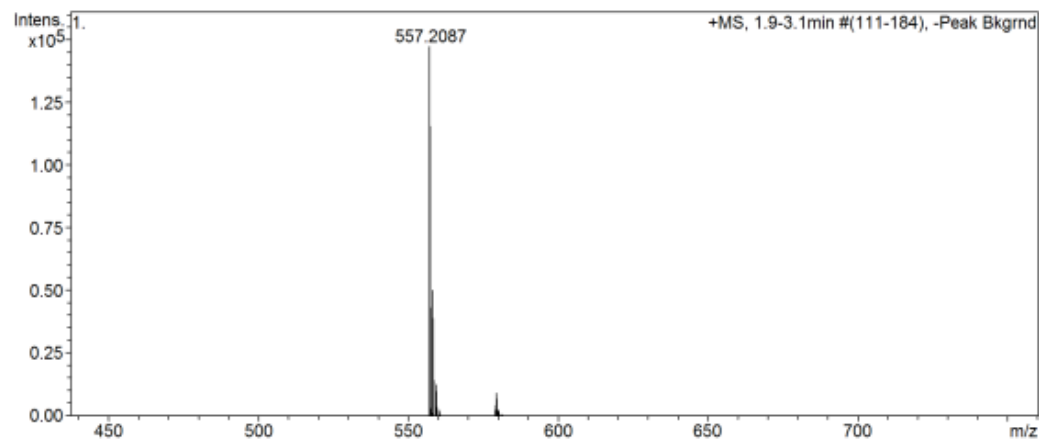

## Absorbance, NL 1.546E06

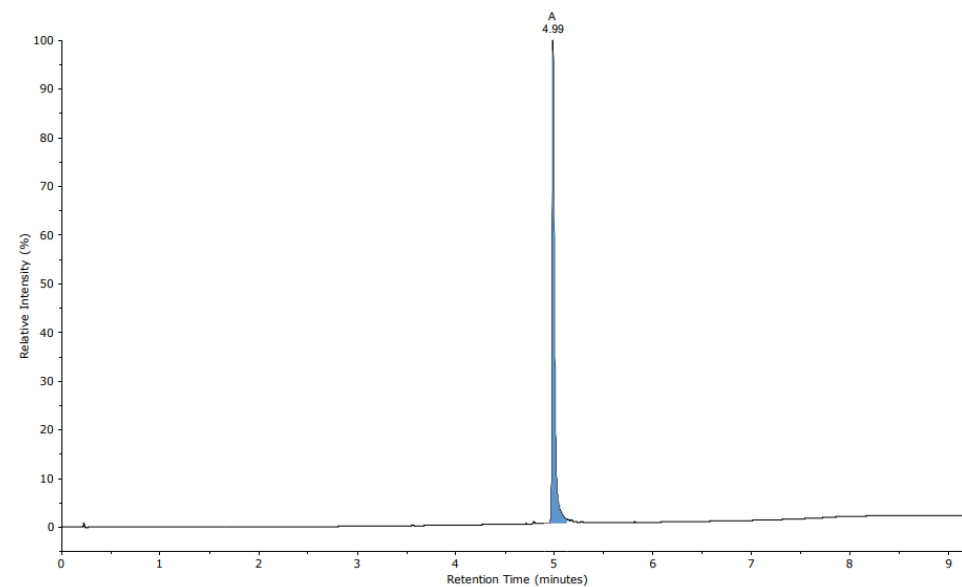

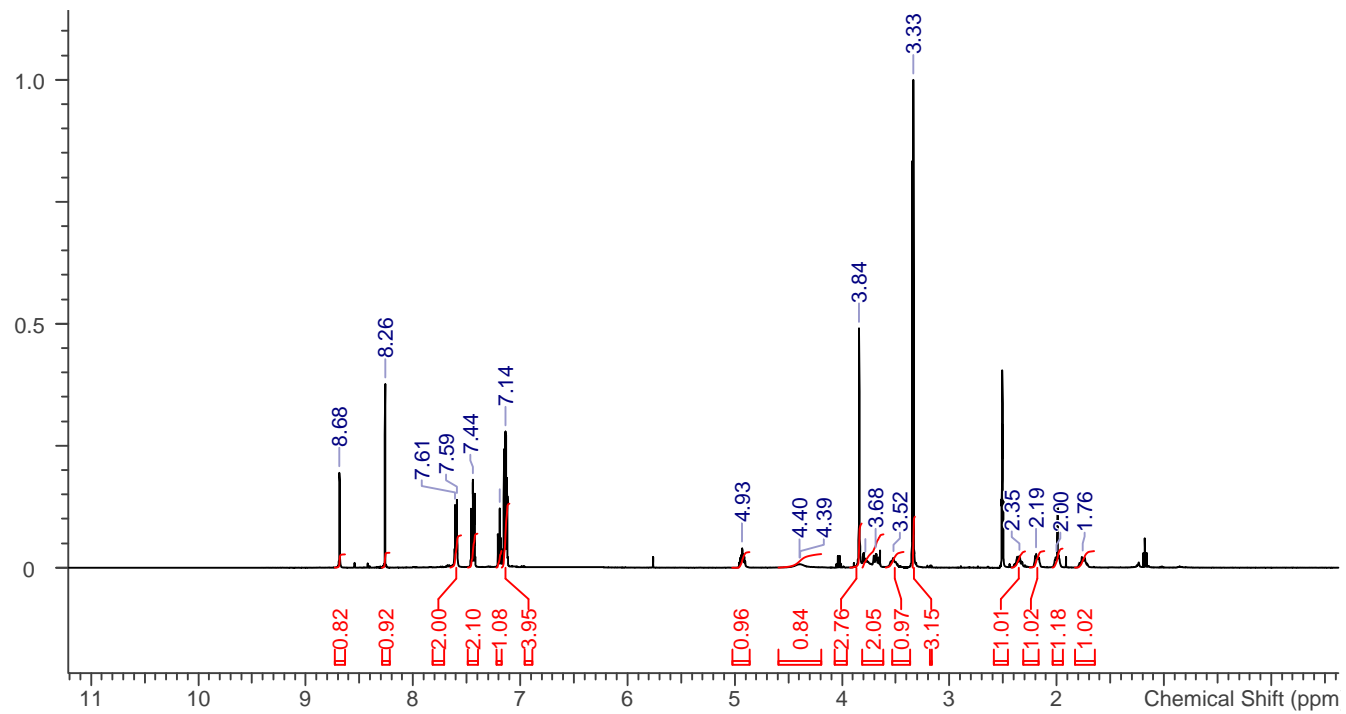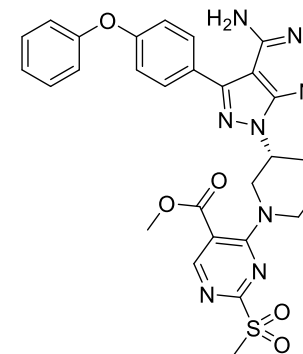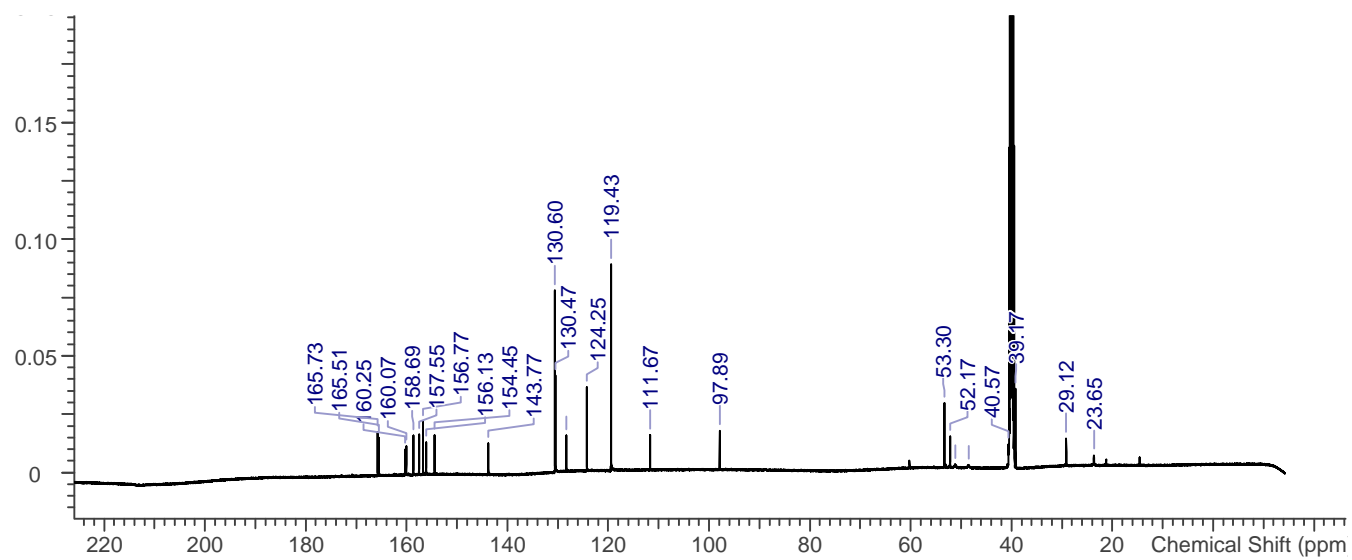



# Chemistry - maXis HPLC-ESI Accurate Mass Report

## Analysis Info

Analysis Name D:\Data\Chemistry\2021\Nov\RSM 212\_RA8\_01\_42968.d  
Method soton lcms pos 120 to 1500.m  
Sample Name RSM 212  
Comment Analyst: RB

Acquisition Date 26/11/2021 14:41:17

Operator MSWEB@SOTON.AC.UK  
Instrument / Ser# maXis 17

## Acquisition Parameter

|             |            |                       |           |                  |           |
|-------------|------------|-----------------------|-----------|------------------|-----------|
| Source Type | ESI        | Ion Polarity          | Positive  | Set Nebulizer    | 4.0 Bar   |
| Focus       | Not active | Set Capillary         | 4000 V    | Set Dry Heater   | 230 °C    |
| Scan Begin  | 120 m/z    | Set End Plate Offset  | -500 V    | Set Dry Gas      | 6.0 l/min |
| Scan End    | 1500 m/z   | Set Collision Cell RF | 300.0 Vpp | Set Divert Valve | Waste     |

## Cmpd 1, 2.4 min

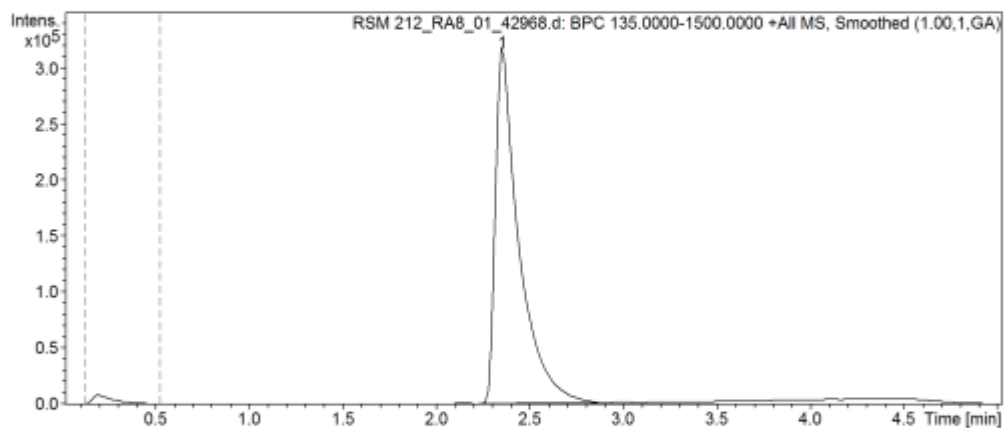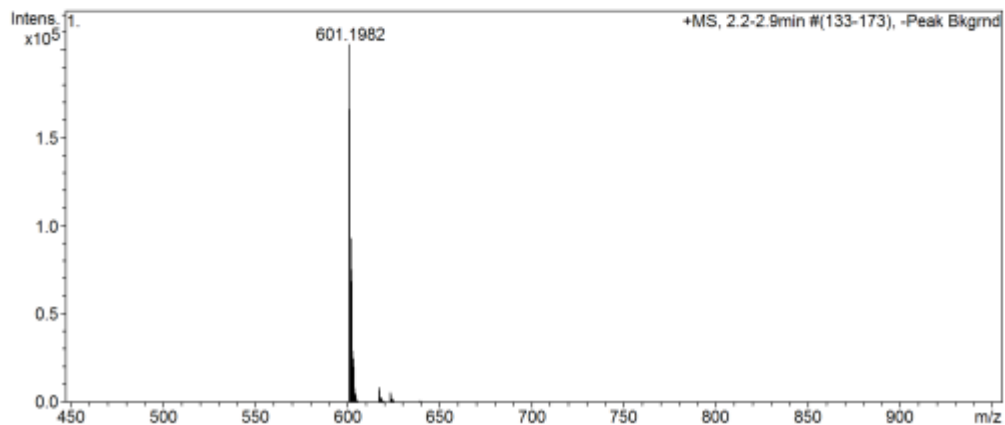

## Absorbance, NL 1.771E06

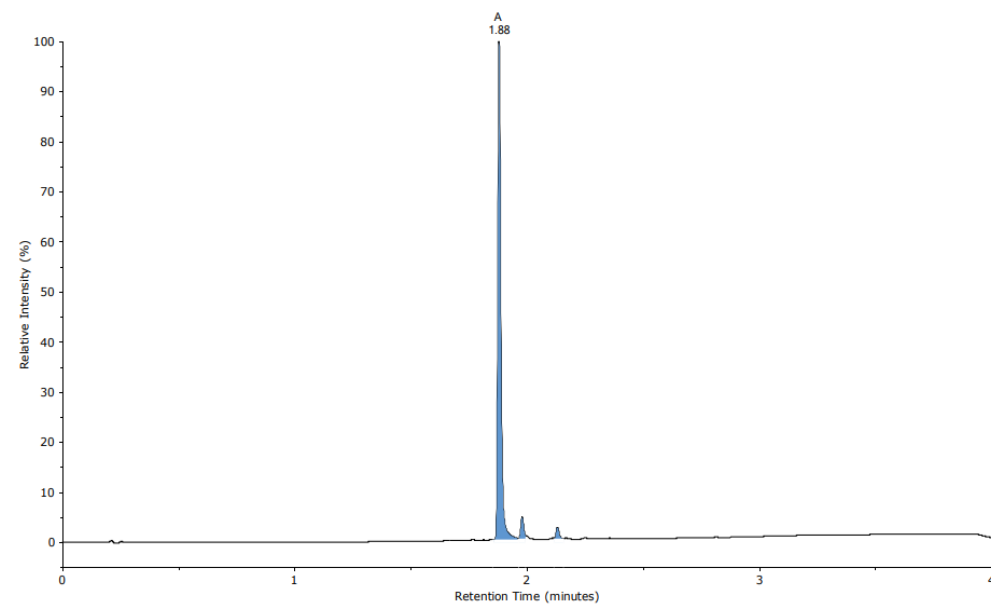

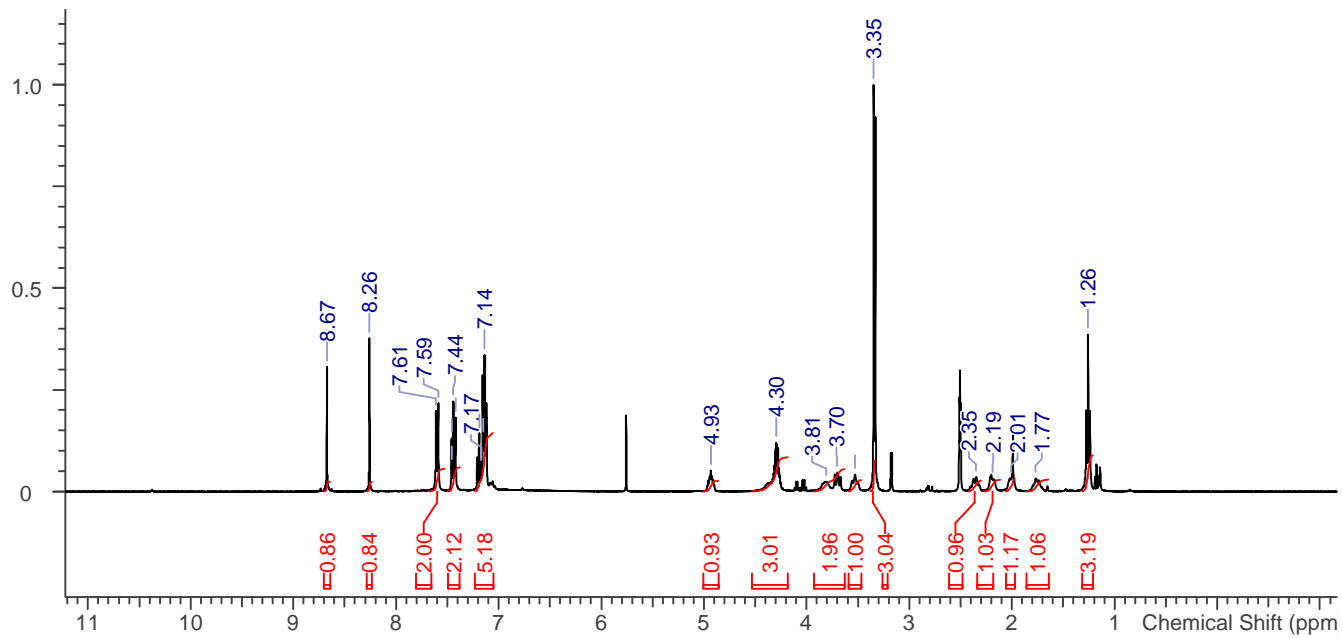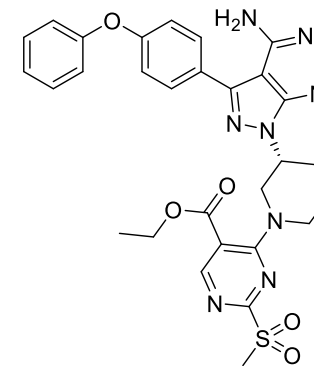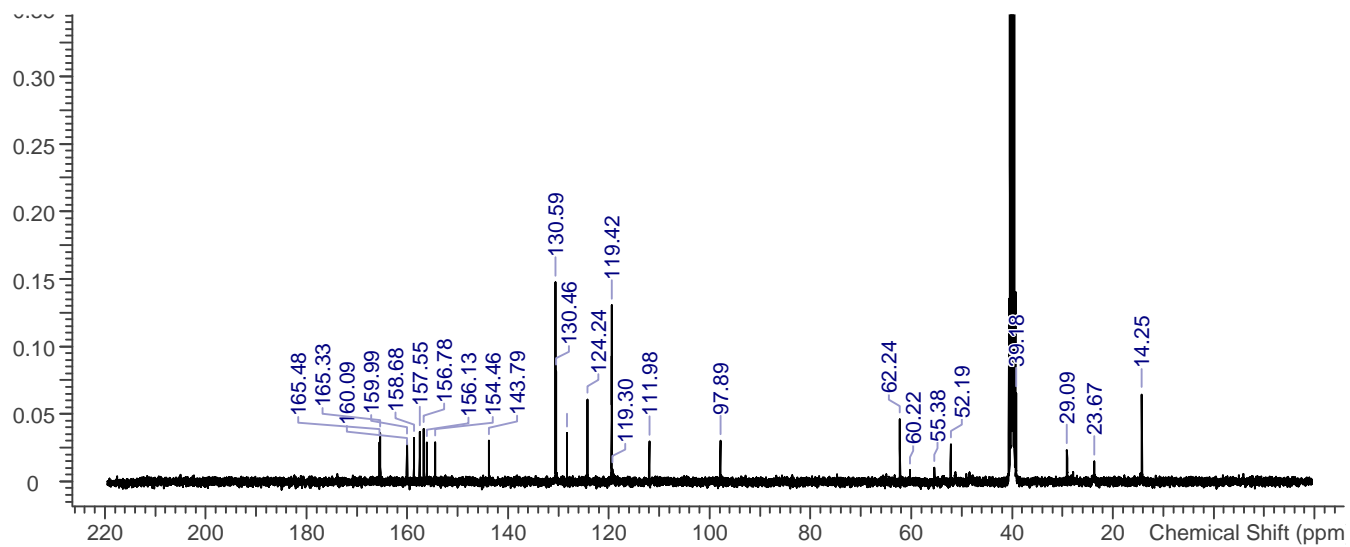

**Acquisition Parameter**

|             |            |                       |           |                  |           |
|-------------|------------|-----------------------|-----------|------------------|-----------|
| Source Type | ESI        | Ion Polarity          | Positive  | Set Nebulizer    | 4.0 Bar   |
| Focus       | Not active | Set Capillary         | 4500 V    | Set Dry Heater   | 230 °C    |
| Scan Begin  | 150 m/z    | Set End Plate Offset  | -500 V    | Set Dry Gas      | 6.0 l/min |
| Scan End    | 1500 m/z   | Set Collision Cell RF | 300.0 Vpp | Set Divert Valve | Waste     |

**Cmpd 1, 2.5 min**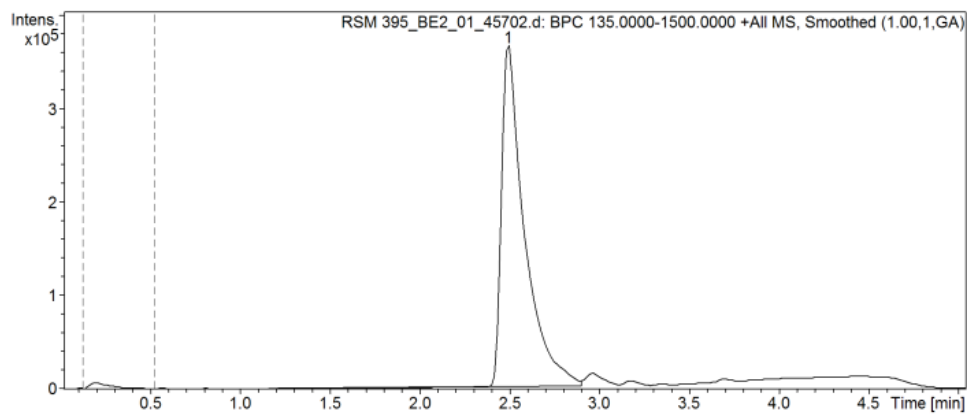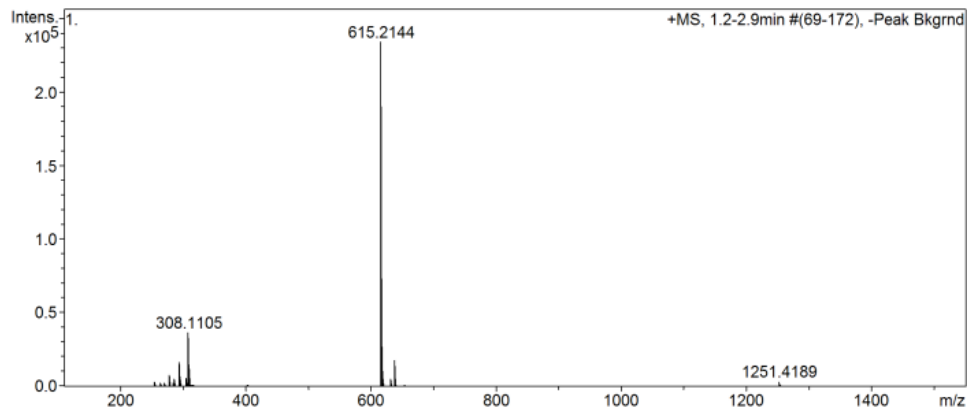**Absorbance, NL 2.728E05**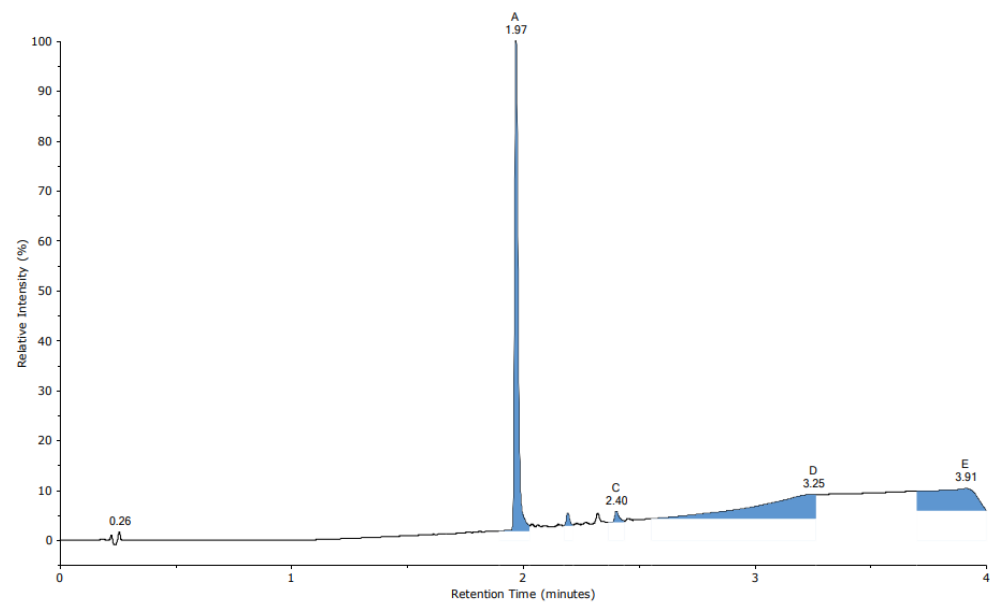

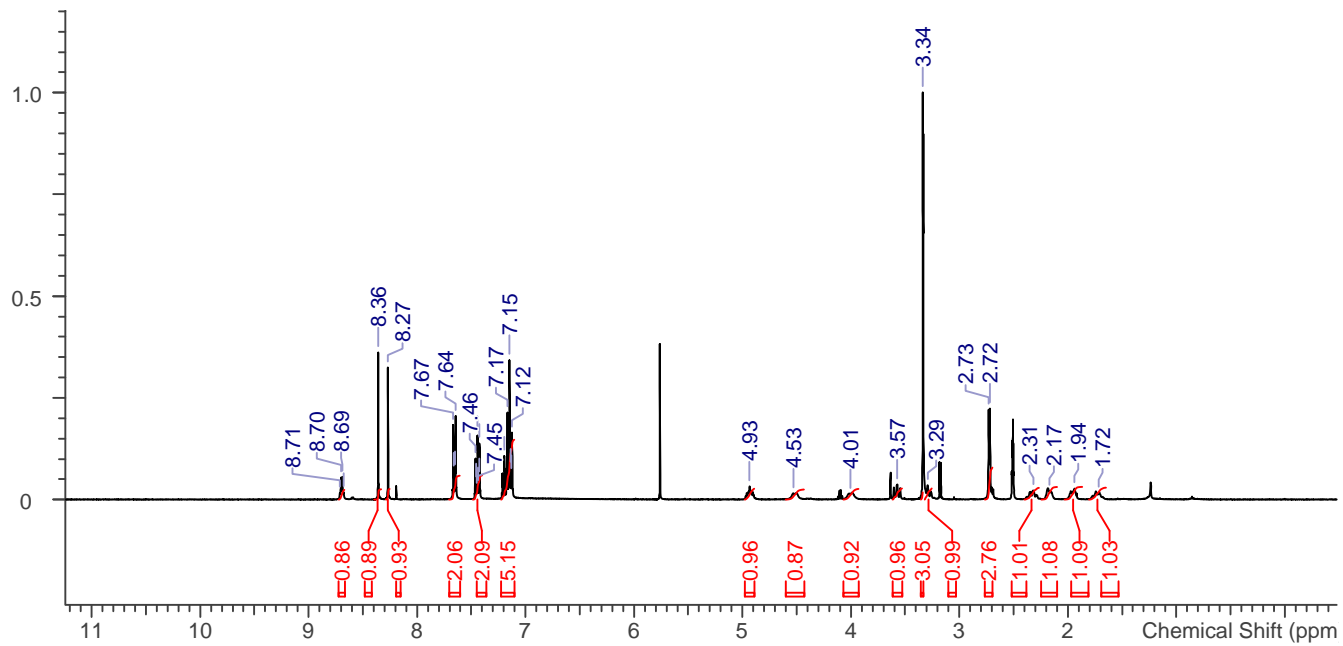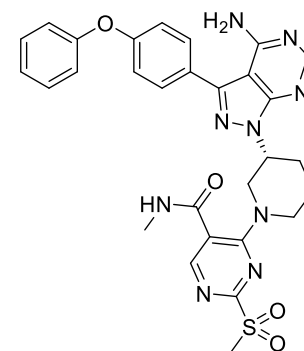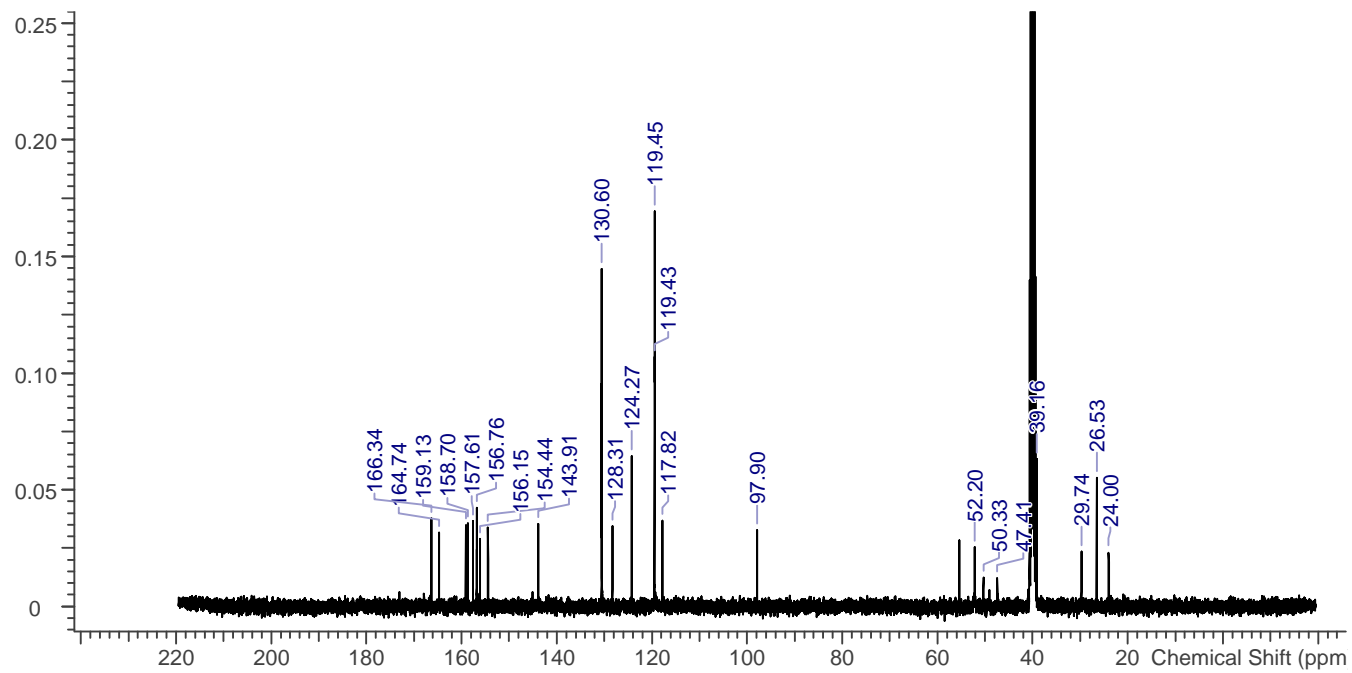

S20

# Chemistry - maXis HPLC-ESI Accurate Mass Report

## Analysis Info

Analysis Name D:\Data\Chemistry\2022\Nov\RSM 400\_RA4\_01\_44731.d  
Method soton lcms pos 120 to 1500.m  
Sample Name RSM 400  
Comment Analyst: JMH

Acquisition Date 17/11/2022 09:34:57

Operator MSWEB@SOTON.AC.UK  
Instrument / Ser# maXis 17

## Acquisition Parameter

|             |            |                       |           |                  |           |
|-------------|------------|-----------------------|-----------|------------------|-----------|
| Source Type | ESI        | Ion Polarity          | Positive  | Set Nebulizer    | 4.0 Bar   |
| Focus       | Not active | Set Capillary         | 4500 V    | Set Dry Heater   | 230 °C    |
| Scan Begin  | 120 m/z    | Set End Plate Offset  | -500 V    | Set Dry Gas      | 6.0 l/min |
| Scan End    | 1500 m/z   | Set Collision Cell RF | 300.0 Vpp | Set Divert Valve | Waste     |

## Cmpd 1, 2.2 min

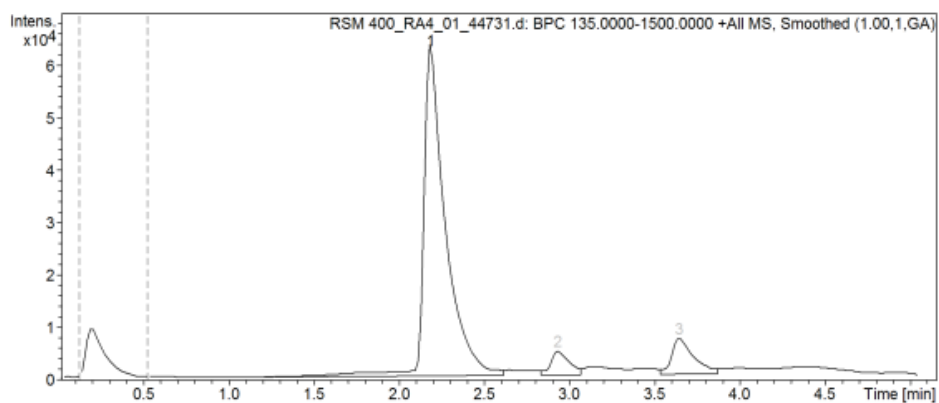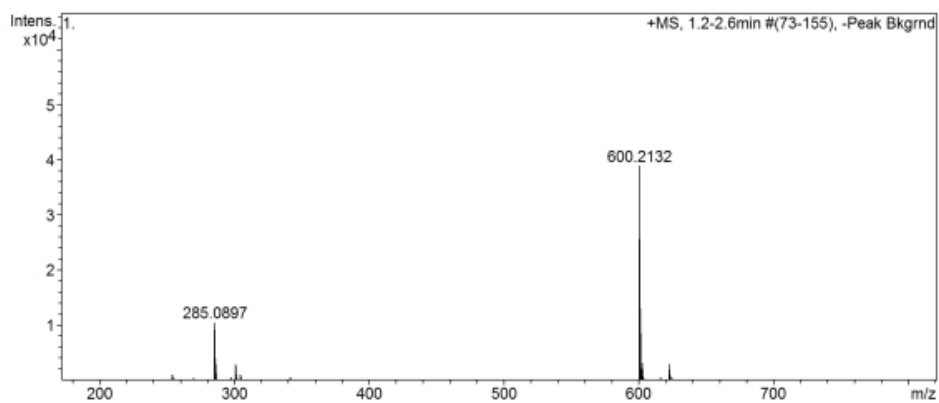

## Absorbance, NL 3.031E06

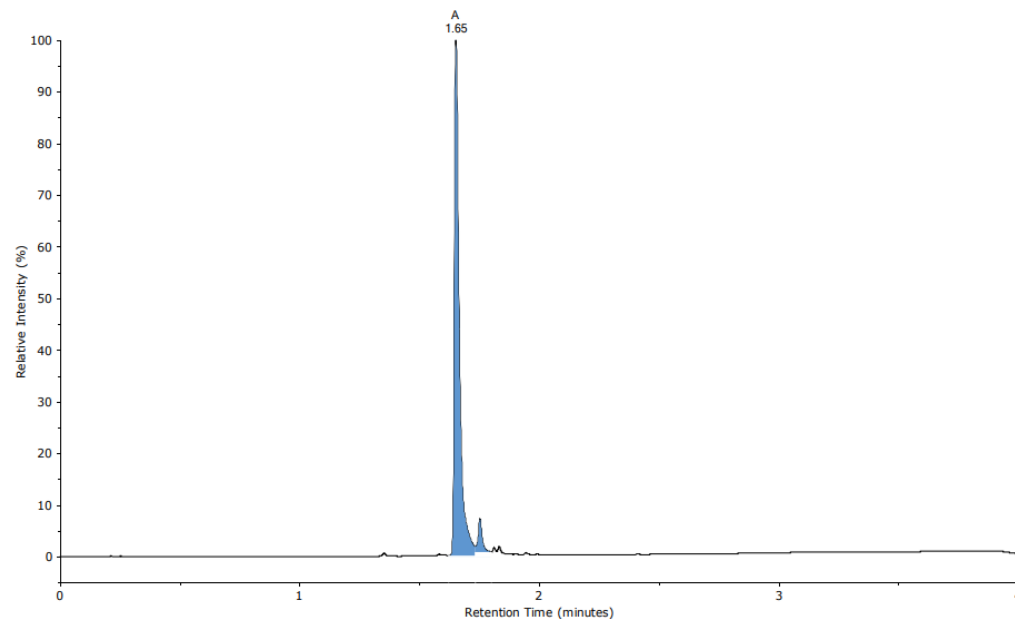

Supplement: jm3c01927_si_001.pdf [file jm3c01927_si_001.pdf]
